# Supplementary material
Source: ML conference proceedings conference paper supplement (https://aclanthology.org/2026.semeval-1.435)

## Evaluation Set

Cohen's d = 1.20

Avg. Gemini Response Length (chars)

1800  
1600  
1400  
1200  
1000  
800  
600  
400

n=85  
mu=691

Clear  
Reply

n=35  
mu=842

Clear  
Non-Reply

n=117  
mu=1021

Ambivalent

## Development Set

Cohen's d = 1.03

n=79  
mu=934

Clear  
Reply

n=23  
mu=958

Clear  
Non-Reply

n=206  
mu=1188

Ambivalent

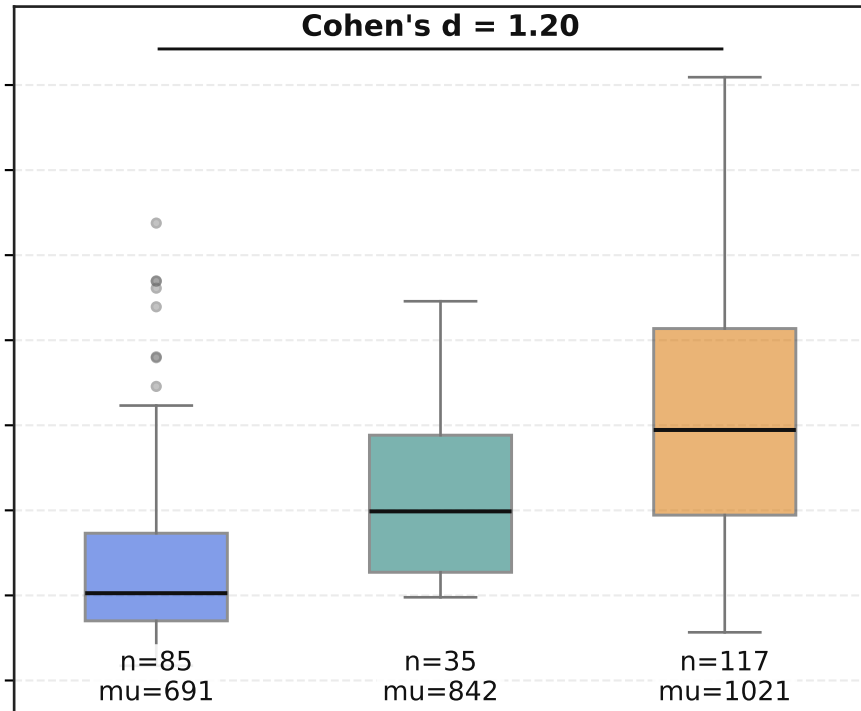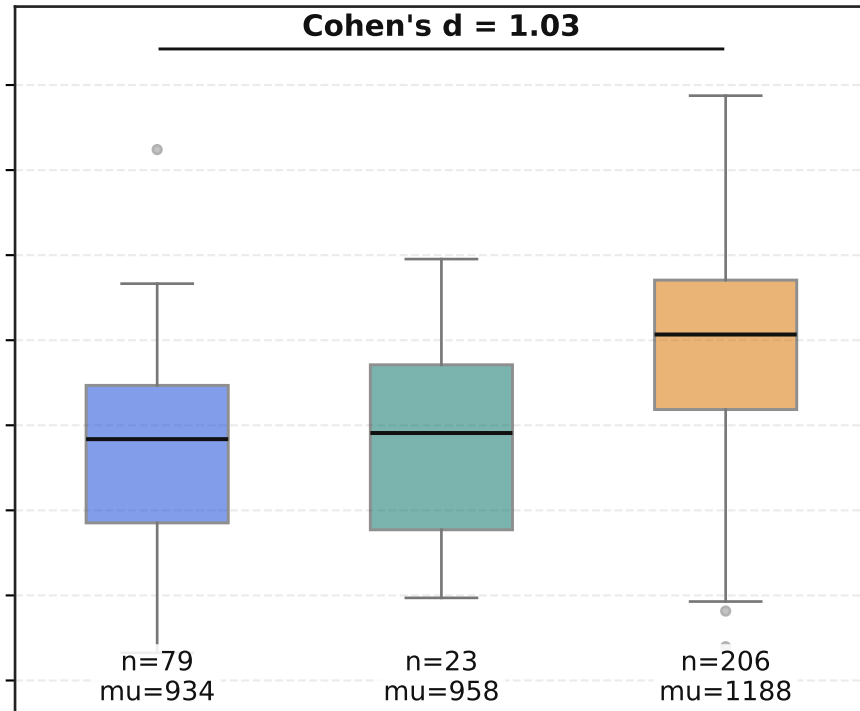

Supplement: SupplementaryMaterial [file fig2_gemini_response_length_boxplot_refined.pdf › paper_code/figures-new/fig2_gemini_response_length_boxplot_refined.pdf]
