# Supplementary material
Source: ML conference proceedings conference paper supplement (https://aclanthology.org/2026.semeval-1.435)

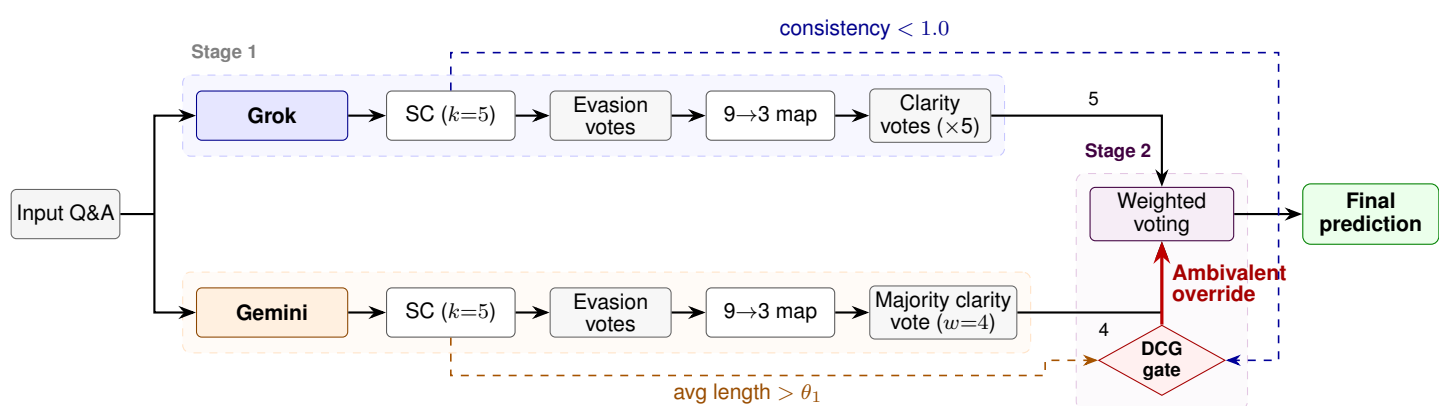

Supplement: SupplementaryMaterial [file fig1_system_architecture_refined.pdf › paper_code/figures-new/fig1_system_architecture_refined.pdf]

# DCG Performance Across Threshold Percentiles

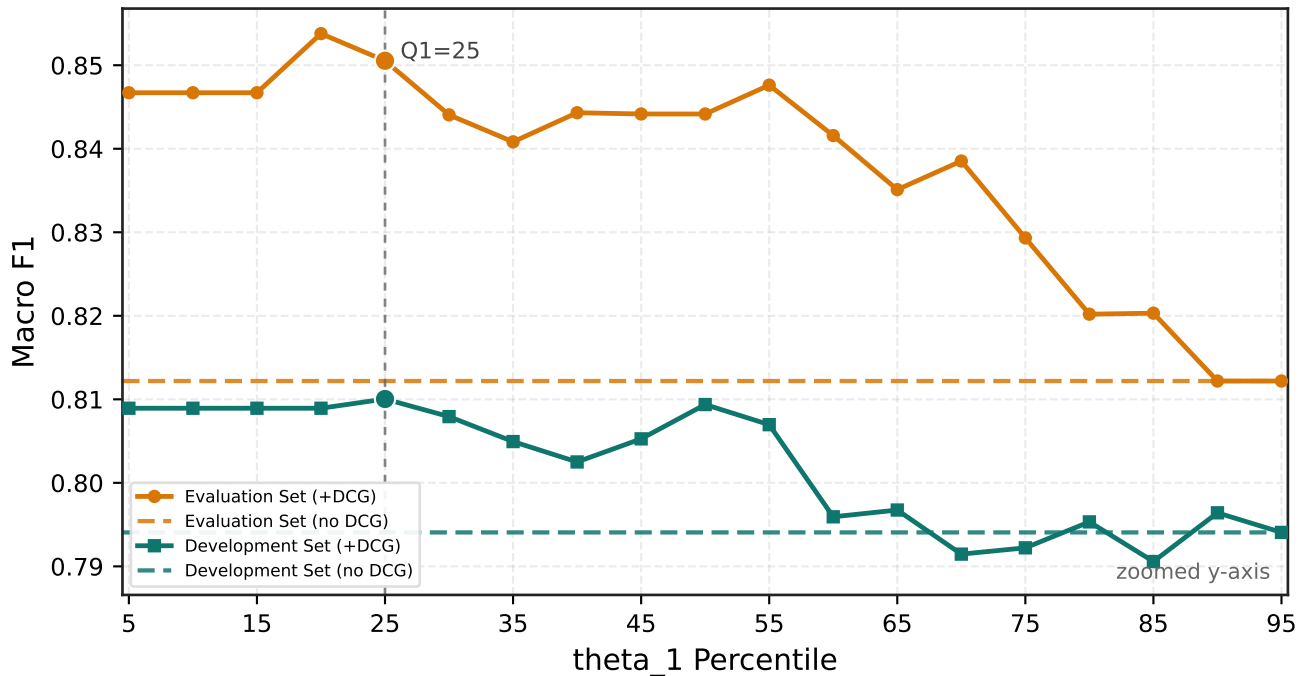

Supplement: SupplementaryMaterial [file fig3_percentile_sweep_refined.pdf › paper_code/figures-new/fig3_percentile_sweep_refined.pdf]

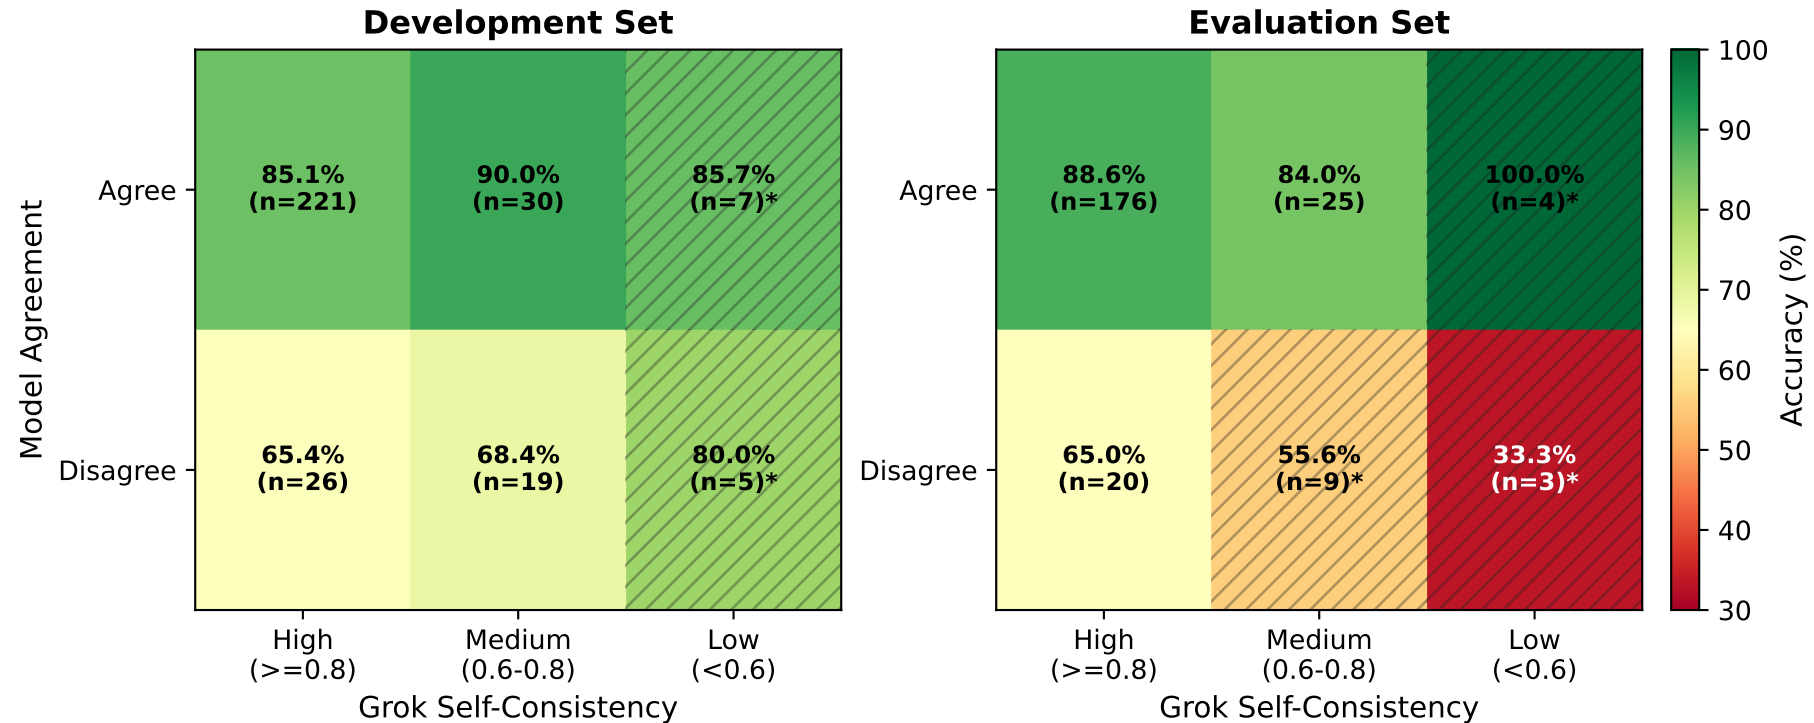

Cells marked with \* have low support (n < 10).

Supplement: SupplementaryMaterial [file fig4_agreement_consistency_heatmap_refined.pdf › paper_code/figures-new/fig4_agreement_consistency_heatmap_refined.pdf]
